# Supplementary material for: Faktencheck Babyhaut
Source: Springer Nature journal article supplement (doi:10.1007/s43877-021-0102-x), 2021-08-01
Supplement: MOESM1 [file 19552560]

## Literatur

### zum Beitrag „Faktencheck Babyhaut“ von Janine Burmester

HebammenWissen (2) 3/2021, S. 40-42

Abdeck D (2016) Neue Empfehlungen zur Säuglingspflege. In: Die Hebamme (Hrsg.): Sonderdruck. Neue Empfehlungen zur Säuglingspflege. Georg Thieme Verlag. KG. Stuttgart. Jg. 29. S.303-306.

AWMF-online (Hrsg.) (2008) Leitlinie Neurodermitis [atopisches Ekzem; atopische Dermatitis]. AWMF-Registernummer: 013-027. S. 4-87. URL://013-027I\_S2k\_Neurodermitis\_2020-06-abgelaufen.pdf (awmf.org); Letzte Überarbeitung: 03/2015. Stand: 03.02.2020.

Axt-Gadermann M, Fölster-Holst R (2017) Windeldermatitis – eine Zivilisationskrankheit. In: Die Hebamme (Hrsg.): Wochenbett. Fortbildung. Georg Thieme Verlag. KG. Stuttgart. Hf. 30: S.276-284.

Blume-Peytavi U, Garcia Bartels N (2010) Hautpflege im Säuglingsalter – Zum Einfluss standardisierter Pflegeregime auf die Hautbarrierefunktion. In: Bayerl C, et al. (Hrsg.): Aktuelle Dermatologie. Georg Thieme Verlag. KG. Stuttgart. Jg. 36. S.214-216.

Büthe K (2020) Das Neugeborene. In: Büthe, K, Schwenger-Fink, C. (Hrsg.): Evidenzbasierte Wochenbettpflege. Eine Arbeitshilfe für Hebammen im Praxisalltag. Kohlhammer Verlag. Stuttgart. 2.Aufl. S.139-145.

Bundesministerium für gesundheitliche Aufklärung (BZgA) (2019) Ohne Wenn und Aber: Sonnenschutz für Kinder. S.1. URL://Ohne Wenn und Aber: Sonnenschutz für Kinder (kindergesundheit-info.de); Stand: 01.02.2020.

Busmann U, Dachs C, Merk HF (2018) Baden, Feuchtigkeitspflege und die Pflege des Windelbereichs. In: Die Hebamme (Hrsg.): Fortbildung. Evidenzbasierte Pflege der Säuglingshaut. Teil 2. Georg Thieme Verlag. KG. Stuttgart. Hf. 31 (04): S.246-253.

Gebauer-Sesterhenn B, Praun M (2014) Das große GU Babybuch. Gräfe und Unzer Verlag GmbH. München. 5. Aufl. S.33.

Gnaiger-Rathmanner J, Hör KR (2018) Soor und Windeldermatitis. In: Drescher, M, Hirte, M, Pfeiffer M (Hrsg.): Homöopathie in der Kinder- und Jugendmedizin. Elsevier/Urban & Fischer Verlag. München. 3. Aufl. S.120-122.

Schneider M (2017) Was hilft am besten bei Kopfgneis? In: Die Hebamme (Hrsg.): Prävention und Gesundheitsförderung bei Neugeborenen. Georg Thieme Verlag. KG. Stuttgart. Hf.30. S.128-131.

Werfel T, Schwerk N, Hansen G, Kapp A (2014) In: Deutsches Ärzteblatt Int. (Hrsg.): Diagnostik und Stufentherapie bei Neurodermitis. DOI: 10.3238/arztebl.2014.0509.

S.1. URL://Diagnostik und Stufentherapie der Neurodermitis (aerzteblatt.de); Stand: 03.02.2020.
